# Supplementary material for: One-step topological preparation of carbon doped and coated TiO2 hollow nanocubes for synergistically enhanced visible photodegradation activity
Source: Royal Society of Chemistry journal article supplement (doi:10.1039/c8ra02427h), 2018-01-01
Supplement: c8ra02427h1.pdf [file c8ra02427h1.pdf]

Electronic Supplementary Information (ESI) for

**One-step topological preparation of carbon doped  
and coated TiO<sub>2</sub> hollow nanocubes and synergistically  
enhancing visible photodegradation activity**

*Chengjiang Zhang<sup>a</sup>, Amin Cao<sup>a</sup>, Lianqing Chen<sup>a,b\*</sup>, Kangle Lv<sup>a</sup>, Tsunghsueh Wu<sup>b</sup>, Kejian Deng<sup>a</sup>*

<sup>a</sup> Key Laboratory of Catalysis and Materials Science of the State Ethnic Affairs Commission & Ministry of Education, South-Central University for Nationalities, Wuhan, 430074, P. R. China.

<sup>b</sup> Department of Chemistry, University of Wisconsin-Platteville, Platteville, 53818, United States

Corresponding Author:

Lianqing Chen, Tel. & Fax. +86-27-67842752

E-mail: [chenlia@uwplatt.edu](mailto:chenlia@uwplatt.edu), [lqchen@mail.scuec.edu.cn](mailto:lqchen@mail.scuec.edu.cn) (L.Q Chen)

## 1. EXPERIMENTAL SECTION

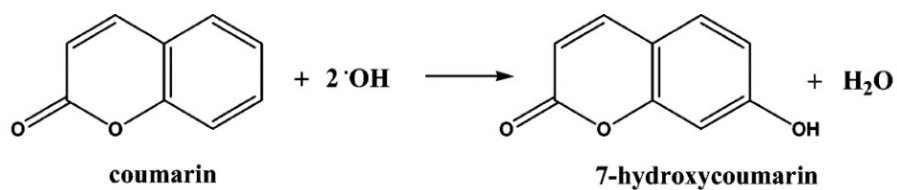

Scheme S1. Formation of 7-hydroxycoumarin in the reaction of coumarin with hydroxyl radical.

## 2. RESULTS AND DISCUSSION SECTION

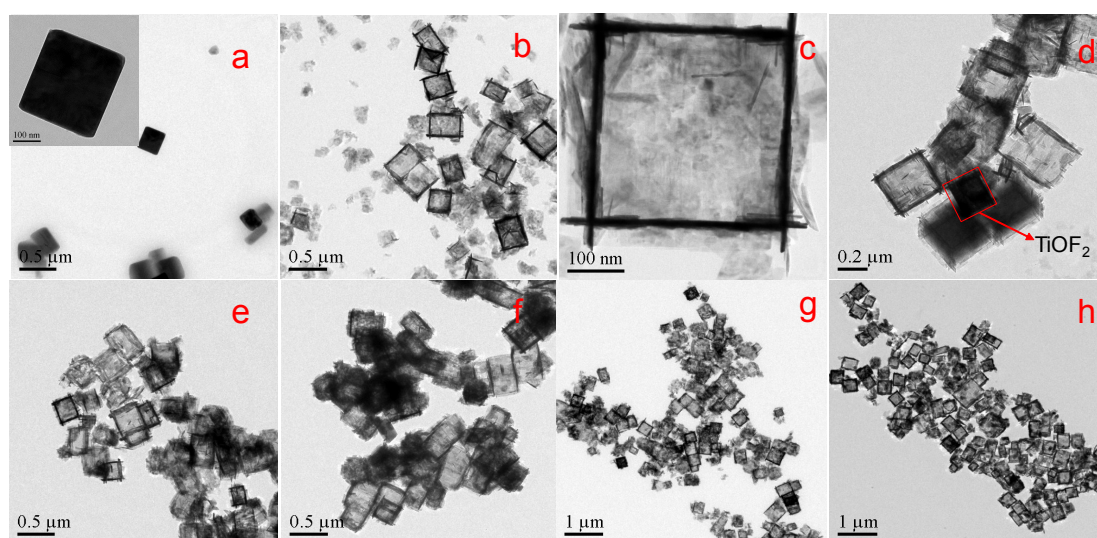

Fig. S1. TEM images of as-synthesized catalysts at different reaction time: (a)  $\text{TiOF}_2$ , (b) and (c)  $\text{TiO}_2$ -HNBs, (d) T-12, (e) T-18, (f) T-24, (g) T-36, (h) T-48.

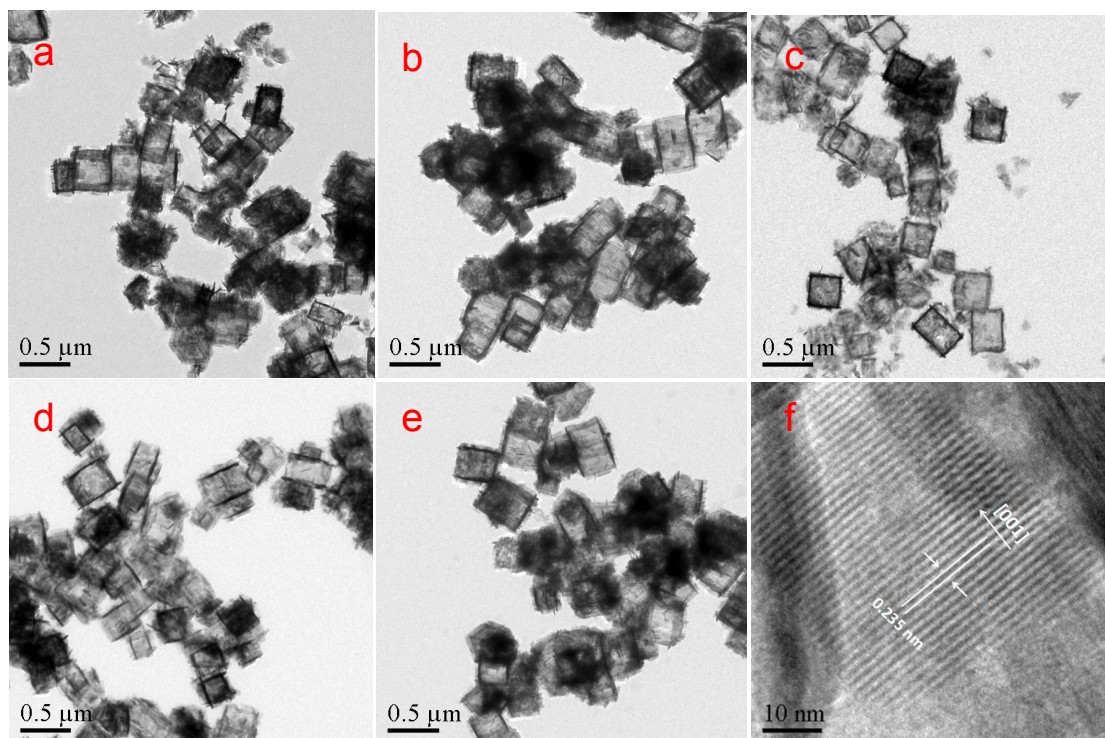

Fig. S2. TEM images of as-prepared catalysts with different mass ratios of Glu/TiO<sub>2</sub> at 24 h: (a) T24-0.05, (b) T24-0.1, (c) T24-0.15, (d) T24-0.2, (e) T24-0.25, (f) HRTEM image of T24-0.1.

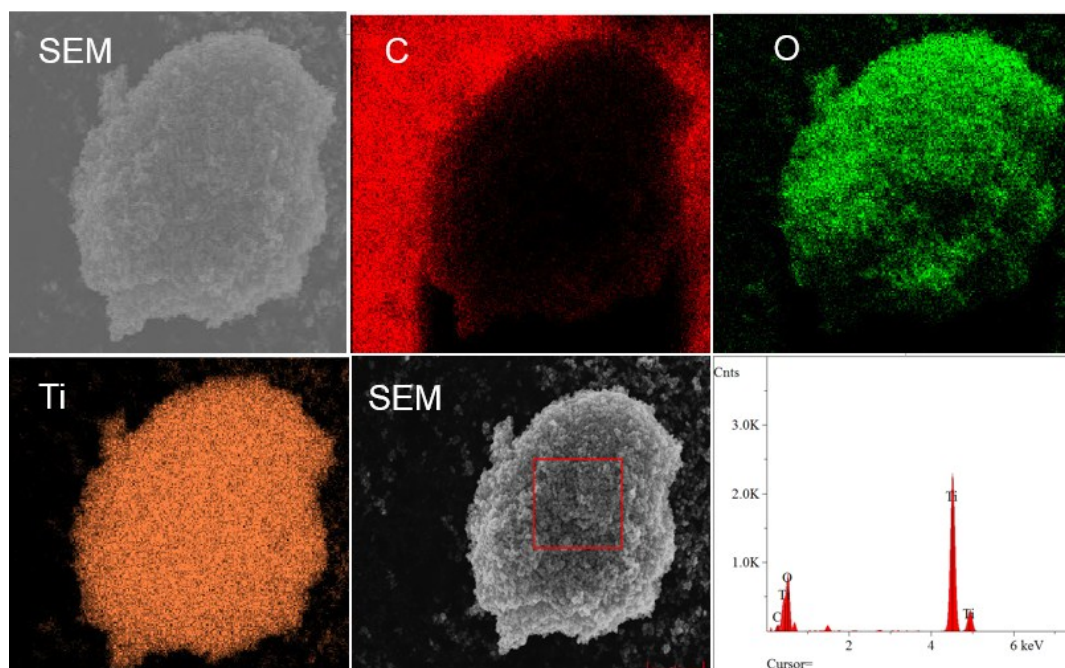

Fig. S3. The scan EDS maps of sample T24-0.15.

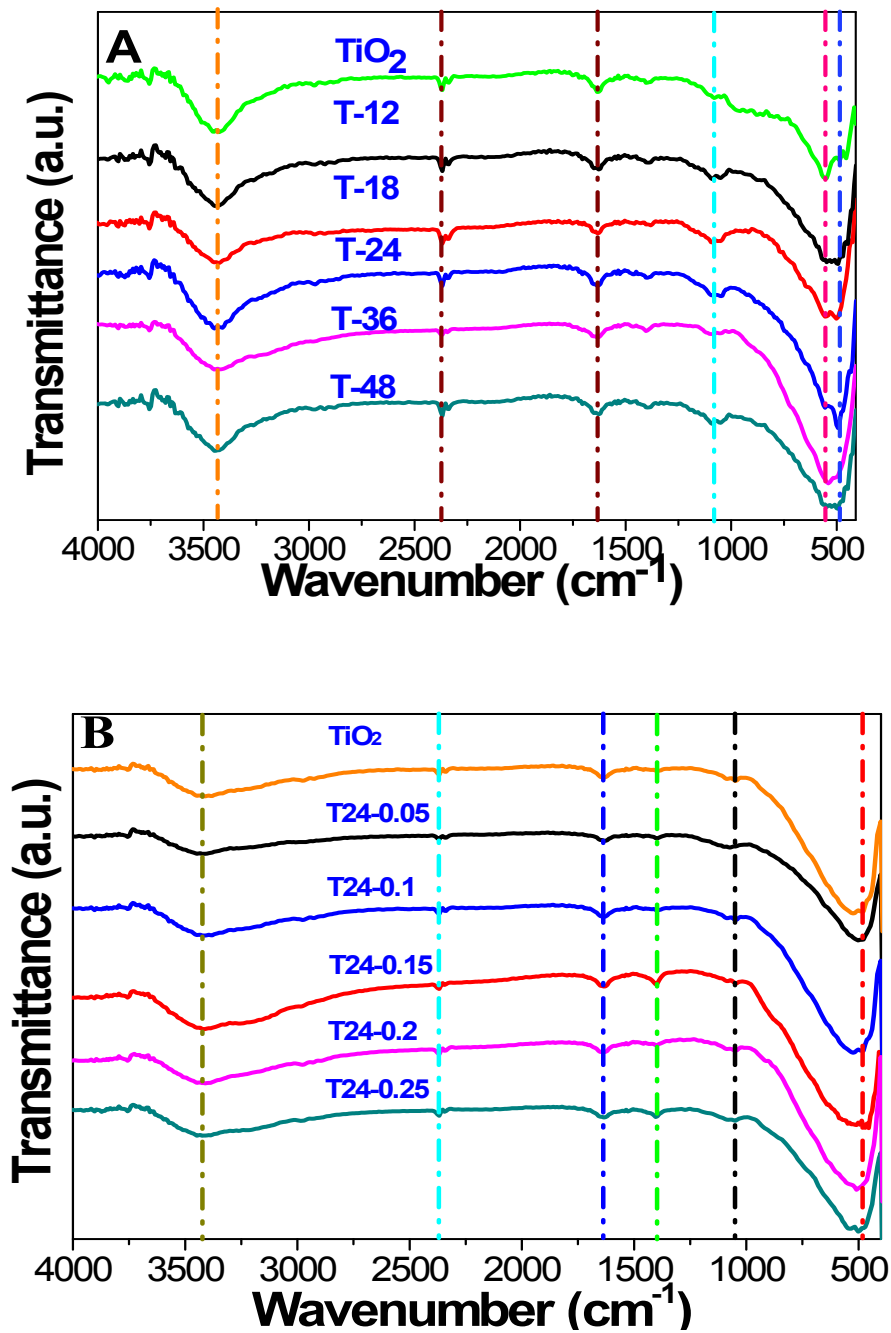

Fig. S4. FT-IR diagram of the catalyst (A Glu/ $\text{TiOF}_2 = 0.1/1$  at  $200^\circ\text{C}$  different reaction time, B Glu/ $\text{TiOF}_2$  at different values reaction at  $200^\circ\text{C}$  for 24 h).

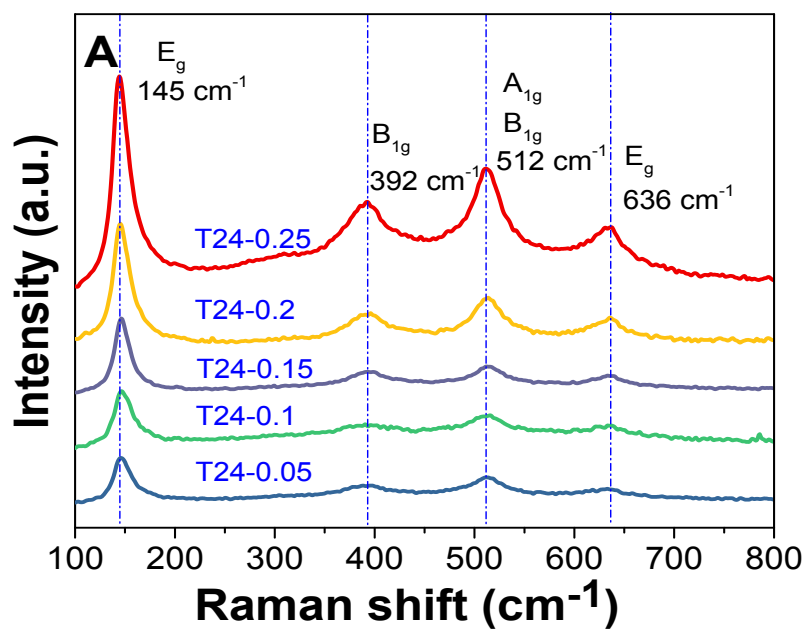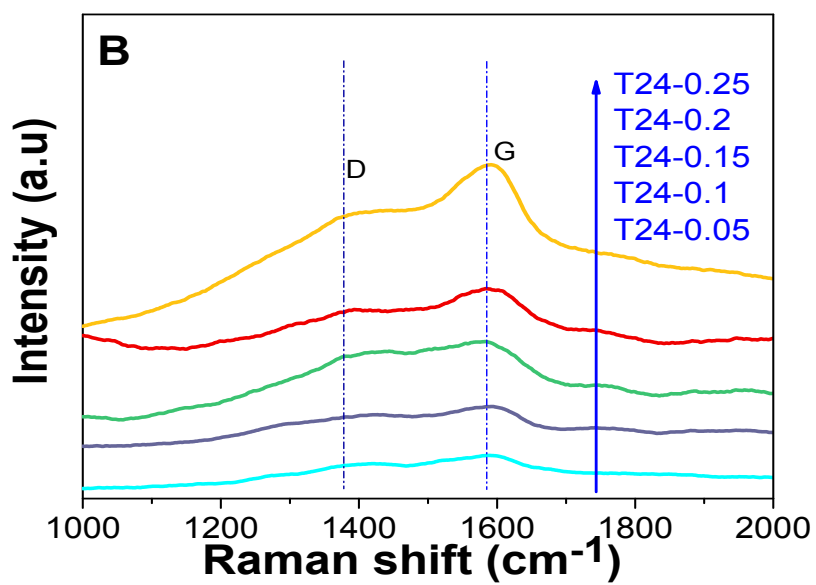

Fig. S5. Raman spectra of as-prepared C@TiO<sub>2</sub>-HNBs.

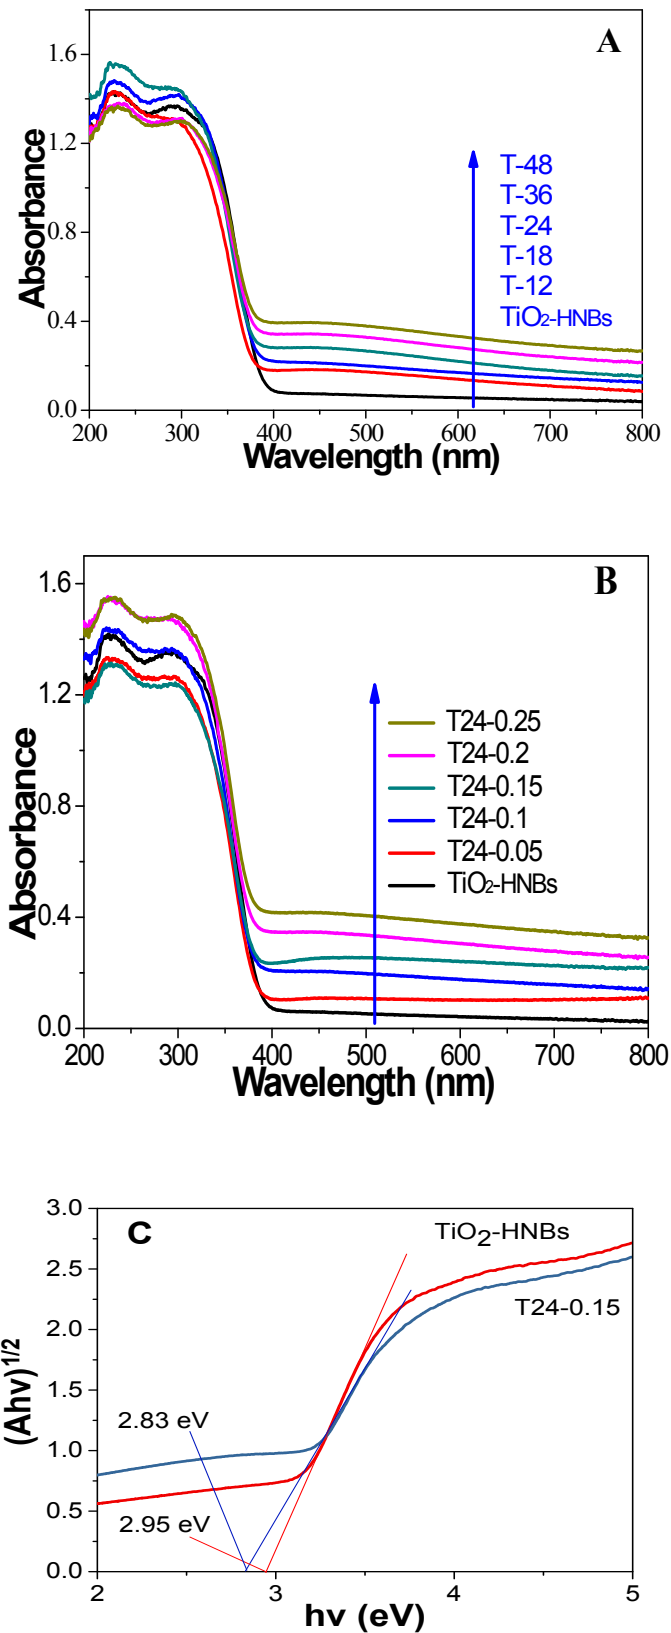

Fig. S6. DRS diagram of as-prepared C@TiO<sub>2</sub>-HNBs (A With Glu/TiOF<sub>2</sub>=0.1/1 at different reaction time; B With different Glu/TiOF<sub>2</sub> mass ratio reacted at 200 °C for 24 h; C the plot of transformed Kubelka-Munk function versus the photon for TiO<sub>2</sub> and T24-0.15 samples).
